# Supplementary material for: Relative Enhancement in Gadoxetate Disodium-Enhanced Liver MRI as an Imaging Biomarker in the Diagnosis of Non-Alcoholic Fatty Liver Disease in Pediatric Obesity
Source: MDPI journal article supplement (doi:10.3390/nu15030558), 2023-01-20
Supplement: s1 [file s1]

## Supplementary Materials

**Table S1** Blood biomarkers of the study collective

| Characteristics                                        | Value | Mean ( $\pm$ SD) | Median | Range         |
|--------------------------------------------------------|-------|------------------|--------|---------------|
| <b>Blood biomarkers on US<sup>a</sup> examination</b>  |       |                  |        |               |
| <b>day</b>                                             |       |                  |        |               |
| <b>Total bilirubin</b>                                 | 73    | 0.54 (0.29)      | 0.46   | 0.13-1.68     |
| <b>Albumin</b>                                         | 61    | 45.60 (3.29)     | 45.70  | 35.70-54.10   |
| <b>Cholinesterase</b>                                  | 42    | 221.70 (1375.07) | 9.76   | 5.77-8921.00  |
| <b>Alkaline phosphatase</b>                            | 73    | 174.62 (93.01)   | 166.00 | 44.00-492.00  |
| <b>ASAT<sup>c</sup></b>                                | 74    | 42.78 (35.72)    | 31.00  | 15.00-209.00  |
| <b>ALAT<sup>d</sup></b>                                | 74    | 67.23 (81.24)    | 37.50  | 16.00-536.00  |
| <b>GGT<sup>e</sup></b>                                 | 74    | 38.74 (72.26)    | 19.50  | 9.00-493.00   |
| <b>Ferritin</b>                                        | 71    | 65.83 (72.37)    | 51.40  | 14.00-567.80  |
| <b>Lipase</b>                                          | 20    | 76.90 (83.25)    | 60.00  | 18.00-403.00  |
| <b>LDH<sup>f</sup></b>                                 | 73    | 250.17 (78.91)   | 242.00 | 94.40-556.00  |
| <b>CRP<sup>g</sup></b>                                 | 74    | 0.75 (0.72)      | 0.61   | 0.00-5.05     |
| <b>Blood biomarkers on MRI<sup>b</sup> examination</b> |       |                  |        |               |
| <b>day</b>                                             |       |                  |        |               |
| <b>Total bilirubin</b>                                 | 73    | 0.53 (0.27)      | 0.46   | 0.20-1.68     |
| <b>Albumin</b>                                         | 60    | 45.68 (3.42)     | 45.85  | 38.00-54.10   |
| <b>Cholinesterase</b>                                  | 42    | 221.71 (1375.07) | 9.76   | 5.77-8921.00  |
| <b>Alkaline phosphatase</b>                            | 74    | 176.15 (93.78)   | 167.50 | 44.00-492.00  |
| <b>ASAT</b>                                            | 74    | 42.84 (34.59)    | 31.00  | 14.00-204.00  |
| <b>ALAT</b>                                            | 74    | 63.47 (70.02)    | 36.00  | 15.00-398.00  |
| <b>GGT</b>                                             | 74    | 37.61 (68.91)    | 18.50  | 9.00-493.00   |
| <b>Ferritin</b>                                        | 71    | 67.29 (72.90)    | 52.70  | 14.00-567.80  |
| <b>Lipase</b>                                          | 20    | 77.80 (83.24)    | 66.00  | 15.00-403.00  |
| <b>LDH</b>                                             | 73    | 263.82 (82.43)   | 248.00 | 145.00-556.00 |
| <b>CRP</b>                                             | 74    | 0.73 (0.78)      | 0.50   | 0.00-5.05     |

<sup>a</sup> US = ultrasound, <sup>b</sup> MRI = magnetic resonance imaging, <sup>c</sup> ASAT = aspartate aminotransferase, <sup>d</sup> ALAT = alanine aminotransferase, <sup>e</sup> GGT =gamma-glutamyltransferase, <sup>f</sup> LDH = lactate dehydrogenase, <sup>g</sup> CRP = C-reactive protein

Data presented are absolute numbers or mean value with standard deviation ( $\pm$ SD), median, and range (Min-Max), when applicable.

**Table S2** Liver MR scan protocol with Gd-EOB-DTPA

| <b>Sequences</b>                                     | <b>Slice<br/>orientation</b> | <b>Matrix</b> | <b>Voxel<br/>mm</b> | <b>FOV<br/>mm</b> | <b>SL<br/>mm</b> | <b>gap<br/>mm</b> | <b>TR<br/>ms</b> | <b>TE<br/>ms</b> | <b>FA<br/>Degree</b> | <b>Time<br/>s</b> |
|------------------------------------------------------|------------------------------|---------------|---------------------|-------------------|------------------|-------------------|------------------|------------------|----------------------|-------------------|
| GRE T1 (2D flash) in-phase                           | Axial                        | 320x320       | 0.5x0.5x5           | 350               | 5                | 1                 | 130              | 2.38             | 70                   | 21                |
| GRE T1 (2D flash) opposed-phase                      | Axial                        | 320x320       | 0.5x0.5x5           | 350               | 5                | 1                 | 130              | 4.85             | 70                   | 21                |
| T2 HASTE FatSat thick radial                         | Coronal                      | 384x384       | 0.8x0.8x50          | 300               | 50               | 25                | 4500             | 750              | 180                  | 62                |
| MRCP sequence with MIP                               | Coronal                      | 256x256       | 1.1x1.1x1           | 280               | 1                |                   | 2000             | 703              | 140                  | 235               |
| T2 HASTE                                             | Axial                        | 320x320       | 1.1x1.1x5           | 350               | 5                | 1                 | 1000             | 95               | 160                  | 47                |
| T1 VIBE FatSat non-contrast                          | Axial                        | 320x320       | 1.1x1.1x2.5         | 350               | 2.5              | 0.5               | 4.76             | 2.29             | 10                   | 16                |
| T1 VIBE FatSat dynamics (arterial and portal-venous) | Axial                        | 320x320       | 1.1x1.1x2.5         | 350               | 2.5              | 0.5               | 4.76             | 2.29             | 10                   | 16x3              |
| T1 VIBE FatSat 5 min post contrast (equilibrium)     | Coronal                      | 288x288       | 1.3x1.3x2.2         | 380               | 2.2              | 0.44              | 2.97             | 1.38             | 10                   | 16                |
| T1 VIBE FatSat 5 min post contrast (equilibrium)     | Axial                        | 320x320       | 1.1x1.1x2.5         | 350               | 2.5              | 0.5               | 4.76             | 2.29             | 10                   | 16                |
| T2 HASTE FatSat                                      | Axial                        | 320x320       | 1.1x1.1x5           | 350               | 5                | 1                 | 1000             | 95               | 160                  | 47                |
| T2 HASTE                                             | coronal                      | 256x256       | 1.4x1.4x4.5         | 350               | 4.5              | 0.9               | 1000             | 102              | 180                  | 45                |
| DWI TSE-EP/ADC                                       | Axial                        | 192x192       | 1.8x1.8x5           | 350               | 5                | 1                 | 5100             | 67               |                      | 133               |
| T2 TSE FatSat triggered                              | Axial                        | 384x384       | 0.9x0.9x5           | 350               | 5                | 1                 | 2000             | 105              | 160                  | 260               |
| T1 VIBE FatSat 20 min post contrast (hepatobiliary)  | Axial                        | 320x320       | 1.1x1.1x2.5         | 350               | 2.5              | 0.5               | 4.76             | 2.29             | 10                   | 16                |
| T1 VIBE FatSat 20 min post contrast (hepatobiliary)  | Coronal                      | 288x288       | 1.3x1.3x2.2         | 380               | 2.2              | 0.44              | 2.97             | 1.38             | 10                   | 16                |

HASTE = Half-Fourier Acquisition Single-shot Turbo spin Echo imaging, DWI TSE-EP/ADC = Diffusion-Weighted Imaging Turbo Spin Echo-Echo-Planar,

MRCP= Magnetic Resonance Cholangiopancreatography; MIP=maximum intensity projection; GRE = gradient echo, VIBE = Volumetric Interpolated Breath-hold

Examination, FOV = field of view, Voxel = voxel size, SL = slice thickness, TR = repetition time, TE = echo time, FA = flip angle, Time = acquisition time.

**Table S3** Imaging biomarkers of liver and spleen on US and on MR images

| Characteristics                                     | Value (%)  | Mean ( $\pm$ SD) | Median  | Range       |
|-----------------------------------------------------|------------|------------------|---------|-------------|
| <b>Imaging biomarkers on US</b>                     |            |                  |         |             |
| • <b>Liver size measured on US (cm)</b>             |            |                  |         |             |
| - AAL <sup>a</sup>                                  |            | 14.65 (2.23)     | 14.95   | 9.70-19.30  |
| - MCL <sup>b</sup>                                  |            | 14.22 (2.26)     | 14.00   | 6.70-19.50  |
| - LSL <sup>c</sup>                                  |            | 11.19 (2.51)     | 11.00   | 5.60-17.60  |
| • <b>Hyperechogenicity of liver parenchyma</b>      |            |                  |         |             |
| - No                                                | 12 (16.22) |                  |         |             |
| - Mild                                              | 15 (20.27) |                  |         |             |
| - Moderate                                          | 32 (43.24) |                  |         |             |
| - Severe                                            | 15 (20.27) |                  |         |             |
| • <b>Spleen size* measured on US (cm)</b>           |            | 10.88 (1.44)     | 11.00   | 6.70-13.60  |
| <b>Imaging biomarkers on MRI</b>                    |            |                  |         |             |
| • <b>Liver size measured on MRI (cm)</b>            |            |                  |         |             |
| - AAL                                               |            | 17.02 (2.59)     | 16.55   | 12.50-24.50 |
| - MCL                                               |            | 10.11 (1.84)     | 10.00   | 5.60-15.00  |
| - LSL                                               |            | 6.96 (1.17)      | 6.85    | 4.80-12.00  |
| • <b>Hepatic fat fraction</b>                       |            |                  |         |             |
| - <5%                                               | 30 (40.54) |                  |         |             |
| - 5-14%                                             | 12 (16.22) |                  |         |             |
| - 15-29%                                            | 20 (27.03) |                  |         |             |
| - > 30%                                             | 12 (16.22) |                  |         |             |
| • <b>Liver volume calculated by syngo.via® (ml)</b> |            | 1791.14 (562.03) | 1743.50 | 861-3401    |
| • <b>Hepatic fat fraction</b>                       |            | 13.87 (13.57)    | 9.60    | -3-45       |
| • <b>Relative enhancement of study collective</b>   | 58         | 1.12 (0.28)      | 1.10    | 0.36-1.80   |
| • <b>RE<sup>d</sup> in subgroup with RE &lt;1</b>   | 19         | 0.85 (0.18)      | 0.92    | 0.36-0.98   |
| • <b>Spleen size* measured on MRI (cm)</b>          |            | 11.79 (1.81)     | 11.85   | 7.50-16.00  |

<sup>a</sup> AAL = anterior axillary line, <sup>b</sup> MCL = medio-clavicular line, <sup>c</sup> LSL = lateral-sternal line, <sup>d</sup> RE = relative enhancement.

\*Spleen size was measured in the long axis of the spleen.

Data presented are absolute numbers or mean value with standard deviation ( $\pm$ SD), median, and range (Min-Max), when applicable. Percentages that apply to the respective groups, or to the whole cohort, are presented in parentheses.
